# Supplementary material for: Genetic variations in the PI3K/PTEN/AKT/mTOR pathway predict tumor response and disease-free survival in locally advanced rectal cancer patients receiving preoperative chemoradiotherapy and radical surgery
Source: PubMed Central journal article supplement — J Cancer. 2018 Feb 28;9(6):1067–77. doi: 10.7150/jca.23538 (PMC5868174; doi:10.7150/jca.23538), 2018-02-28
Supplement: jcav09p1067s1.pdf [file jcav09p1067s1.pdf]

**Supplemental Table 1 Primers and probe sequences used in the SNP assays**

| SNP name         | Primers and probes | Sequence (5'-3')        |
|------------------|--------------------|-------------------------|
| AKT1:rs2494738   | Forward            | GTGCCAGGACAGATGTGC      |
|                  | Reverse            | TCTGCCTTCCCGTTGAC       |
|                  | Probe1             | AGGCGCGGTACGGGAGC       |
|                  | Probe2             | AGGCGCGGTACAGGAGC       |
| AKT1:rs1130214   | Forward            | AATGAACCAGATTCAGACCG    |
|                  | Reverse            | AGGAAGACAGGACCAGGATG    |
|                  | Probe1             | TCCAGCGCAAGCCCAAA       |
|                  | Probe2             | TCCAGCGCAAGCACAAA       |
| AKT2:rs8100018   | Forward            | GCCTAATTCCCAAACCCTAC    |
|                  | Reverse            | GGCAGCAAAGCGAGACTC      |
|                  | Probe1             | CCTGTCCCCGCCCCCT        |
|                  | Probe2             | CCTGTCCCCGGCCCCCT       |
| FRAP1:rs11121704 | Forward            | GGGCGAGCTATTTTATGCTAC   |
|                  | Reverse            | TGCTGTCCTTACAAGAGGTAAGA |
|                  | Probe1             | AGGCACATCATCACAGA       |
|                  | Probe2             | AGGCACATCATCGCAGA       |
| FRAP1:rs2295080  | Forward            | TCCCCGCTGTCTCTAAG       |
|                  | Reverse            | CGTGGTTTGTCTATTTGAACAG  |
|                  | Probe1             | AGGAGGGTTCCCAGCCC       |
|                  | Probe2             | AGGAGGGTTCCCATCCC       |
| PIK3CA:rs7651265 | Forward            | CGTGGCATCTTGAAGAGAGA    |
|                  | Reverse            | AGAGCAATATCTGGGTAAAAATG |
|                  | Probe1             | TGTGTTATTCTACTCCT       |
|                  | Probe2             | TGTGTTATTCTGCTCCT       |
| PIK3CA:rs7640662 | Forward            | CTTACCAGCAGGCTGTTTTTC   |
|                  | Reverse            | CTGTGATCGTGGTGGTGATT    |
|                  | Probe1             | CACCTTCTCCTTAGCCT       |

|                  |         |                        |
|------------------|---------|------------------------|
|                  | Probe2  | CACCTTCTCGTTAGCCT      |
| PIK3CA:rs6443624 | Forward | TCTGGAATTATCAGCCAAGTT  |
|                  | Reverse | GCCTTTGTAAATATGCTCCAT  |
|                  | Probe1  | TTCAGCCCAAGTATCTT      |
|                  | Probe2  | TTCAGCCCAAGTAGCTT      |
| PIK3CA:rs7621329 | Forward | ATATCATCAAATTCAAAGCAGC |
|                  | Reverse | CCTTTCCCTGCTGTCATGTA   |
|                  | Probe1  | CAGATTGGAGTTTATAA      |
|                  | Probe2  | CAGATTGGAGTTTGTAA      |
| PIK3CA:rs2699887 | Forward | GAGTCTCCGGCACCCAC      |
|                  | Reverse | CCCGATGCGGTTAGAGC      |
|                  | Probe1  | ACCGGCCAGTCCGCGC       |
|                  | Probe2  | ACCGGCCAATCCGCGC       |
| PTEN:rs2299939   | Forward | GCCTGGCTAAATTGATCAGTA  |
|                  | Reverse | CAATCGTAGGCGGTAACCT    |
|                  | Probe1  | TTGTTATGGAATGAGAA      |
|                  | Probe2  | TTGTTATGGAATGCGAA      |
| PTEN:rs1256998   | Forward | CCCTGGGCATGTGTAGTGA    |
|                  | Reverse | TCCAGAGCTATTTACCCCCT   |
|                  | Probe1  | CCTTAAATGTTTGGCTC      |
|                  | Probe2  | CCTTAAATGTTGGGCTC      |
| PTEN:rs12357281  | Forward | TATTTTCAAACAGGCTCTCACA |
|                  | Reverse | CCCTACAAATTTTGGCTCAAAT |
|                  | Probe1  | AGGAACTATATgTTGCC      |
|                  | Probe2  | AGGAACTATATcTTGCC      |

Abbreviations: SNP: single-nucleotide polymorphism
